# Supplementary material for: Significance of Photosynthetic Characters in the Evolution of Asian Gnetum (Gnetales)
Source: Front Plant Sci. 2019 Feb 5;10:39. doi: 10.3389/fpls.2019.00039 (PMC6370715; doi:10.3389/fpls.2019.00039)
Supplement: TABLEE S1 — Complete list of protein-coding genes in chloroplast genomes included in this study. See Table 2 for GenBank accession numbers. [file Table_1.XLSX]

## Sheet: Sheet1
Gene	accD = 1-1200	atpA = 1201-2718	atpB = 2719-4185	atpE = 4186-4572	atpF = 4573-5115	atpH = 5116-5355	atpI = 5356-6096	ccsA = 6097-6768	cemA = 6769-7422	clpP = 7423-8004	infA = 8005-8226	matK = 8227-9507	ndhA = 9508-10593	ndhB = 10594-12123	ndhC = 12124-12483	ndhD = 12484-13971	ndhE = 13972-14271	ndhF = 14272-16470	ndhG = 16471-16995	ndhH = 16996-18168	ndhI = 18169-18633	ndhJ = 18634-19101	ndhK = 19102-19956	petA = 19957-20847	petB = 20848-21489	petD = 21490-21960	petG = 21961-22068	petL = 22069-22251	petN = 22252-22338	psaA = 22339-24573	psaB = 24574-26772	psaC = 26773-26997	psaI = 26998-27105	psaJ = 27106-27228	psbA = 27229-28284	psbB = 28285-29802	psbC = 29803-31158	psbD = 31159-32214	psbE = 32215-32457	psbF = 32458-32574	psbH = 32575-32787	psbI = 32788-32892	psbJ = 32893-33012	psbK = 33013-33138	psbL = 33139-33249	psbM = 33250-33351	psbN = 33352-33480	psbT = 33481-33579	psbZ = 33580-33762
Gnetum
Pinus
Gingko
Pteridaceae
Populus
Salix
Lonicera
Styrax
Sasa
	1	2	3	4	5	6	7	8	9	10	11	12	13	14	15	16	17	18	19	20	21	22	23	24	25	26	27	28	29	30	31	32	33	34	35	36	37	38	39	40	41	42	43	44	45	46	47	48	49
[truncated: 29 more columns]
